# Supplementary material
Source: ML conference proceedings conference paper supplement (https://www.ecva.net/papers/eccv_2020/papers_ECCV/html/123590698_ECCV_2020_paper.php)
Supplement: Supplementary file 3 [file 123590698-supp.zip]

Archive with 4 entries (4 files):
- supp_video_final.mp4
- __MACOSX/._supp_video_final.mp4
- 2256-supp.pdf
- __MACOSX/._2256-supp.pdf
